# Supplementary material for: Associations between the New DNA-Methylation-Based Telomere Length Estimator, the Mediterranean Diet and Genetics in a Spanish Population at High Cardiovascular Risk
Source: MDPI journal article supplement (doi:10.3390/antiox12112004), 2023-11-15
Supplement: s1 [file s1]

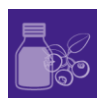

## Article

# Associations between the new DNA-methylation-based telomere length estimator, the Mediterranean diet, and genetics in a Spanish population at high cardiovascular risk

Oscar Coltell, Eva M Asensio, José V. Sorlí, Carolina Ortega-Azorín, Rebeca Fernández-Carrión, Eva C Pascual, Rocío Barragán, José I González, Ramon Estruch, Juan F Alzate, Alejandro Pérez-Fidalgo, Olga Portolés, Jose M Ordovas, and Dolores Corella.

## SUPPLEMENTARY MATERIAL

### INDEX

|                                                                                                                                                                                                    |    |
|----------------------------------------------------------------------------------------------------------------------------------------------------------------------------------------------------|----|
| Table S1. Quantitative 17-item questionnaire for Adherence to Mediterranean diet. ....                                                                                                             | 2  |
| Figure S1. Association between telomere length-DNA methylation and chronological age in men (A), and in women (B).. ....                                                                           | 3  |
| Table S2. Association between the methylation sites included in the leukocyte DNAmTL computation and the estimated DNAmTL in the population. ....                                                  | 4  |
| Figure S2. Telomere length (DNAmTL <sub>adjustAge</sub> ) depending on the categories of the genetic risk score (GRS) combining the effect alleles (associated with shorter TL) for the SNPs. .... | 5  |
| Table S3. Compliance (%) of adherence to the Mediterranean diet for each item of the 17-I score by sex.....                                                                                        | 6  |
| Table S4. Association between the particular items (foods/beverages) of the Mediterranean diet score (17-I) with telomere length by sex. ....                                                      | 7  |
| Figure S3. Q-Q plot for the Genome-Wide Association Study (GWAS) of telomere length (DNAmTL) adjusted for sex and age in this population. ....                                                     | 8  |
| Figure S4. Zoom plots of the selected top-ranked SNPs for the GWAS of DNAmTL. ....                                                                                                                 | 9  |
| Table S5. FORGEdb total and detailed scores for the 10 top-ranked SNPs in the GWAS for DNAmTL .....                                                                                                | 10 |
| Figure S5. Gene expression heatmap based on the dataset GTExV8 (54 tissue types), showing the average expression for the IQSEL1, NACPG2 and PTPRN2 genes selected in the GWAS for DNAmTL.....      | 10 |
| Table S6. Coefficients obtained in the SNP-based Genome-Wide Association Study (GWAS) for DNAmTL adjusted for additional covariates .....                                                          | 11 |
| Figure S6. Manhattan plot for the gene-based GWAS analysis for telomere length-DNA methylation adjusted for age .....                                                                              | 12 |
| Figure S7. Manhattan plot of the SNP-based GWAS analyzing the interaction between the SNPs and adherence to Mediterranean Diet in determining telomere length (DNAmTL <sub>adjustAge</sub> ). .... | 12 |

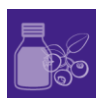**Table S1.** Quantitative 17-item questionnaire for Adherence to Mediterranean diet.

| Food items and frequency of consumption                                                                                                                                                           | Criteria for 1 point <sup>1</sup>              |
|---------------------------------------------------------------------------------------------------------------------------------------------------------------------------------------------------|------------------------------------------------|
| 1. Do you use extra virgin olive oil as the main culinary fat?                                                                                                                                    | Yes                                            |
| 2. How many servings of vegetables do you consume per day?<br>(Count garnish and side servings as ½ point; 1 serving = 200g)                                                                      | ≥2                                             |
| 3. How many pieces of fruit or 100% natural fruit juice do you consume per day?                                                                                                                   | ≥3                                             |
| 4. How many servings of red meat, hamburgers or meat products (ham, sausage, etc.) do you consume per week? (1 serving = 100–150g)                                                                | ≤1                                             |
| 5. How many servings of butter, margarine, or cream do you consume per week? (1 serving = 12g)                                                                                                    | <1                                             |
| 6. How many sugar-sweetened beverages (sodas, tonic waters, energy drinks, fruit juices with added sugar) do you consume per week?                                                                | <1                                             |
| 7. How many servings of legumes do you consume per week? (1 serving = 150g)                                                                                                                       | ≥3                                             |
| 8. How many servings of fish / shellfish do you consume per week? (1 serving = 100–150g, or 4–5 pieces of fish, or 200g of shellfish)                                                             | ≥3                                             |
| 9. How many times per week do you consume pastries, such as cookies, sweets or cakes?                                                                                                             | <3                                             |
| 10. How many times per week do you consume nuts <sup>2</sup> ? (1 serving = 30g)                                                                                                                  | ≥3                                             |
| 11. Do you preferentially consume chicken, turkey, or rabbit meat instead of beef, pork, hamburgers, or sausage?                                                                                  | Yes                                            |
| 12. How many times per week do you consume vegetables, pasta, rice, or other dishes seasoned with <i>sofrito</i> (sauce made with tomato and onion, leek, or garlic and simmered with olive oil)? | ≥2                                             |
| 13. Do you add sugar to beverages (coffee, tea)?                                                                                                                                                  | No/use artificial sweeteners                   |
| 14. How many servings of white bread do you consume per day? (1 serving = 75g)                                                                                                                    | ≤1                                             |
| 15. How many servings of whole grains (bread, rice, pasta) do you consume per week?                                                                                                               | ≥5                                             |
| 16. How many servings of refined bread, rice and/or pasta do you consume per week?                                                                                                                | <3                                             |
| 17. Do you drink wine? How much do you consume per week? (1 glass = 100ml)                                                                                                                        | Men: 2–3 glasses/day<br>Women: 1–2 glasses/day |

<sup>1</sup> 0 points if the criteria is not met. <sup>2</sup> including peanuts.

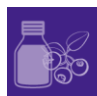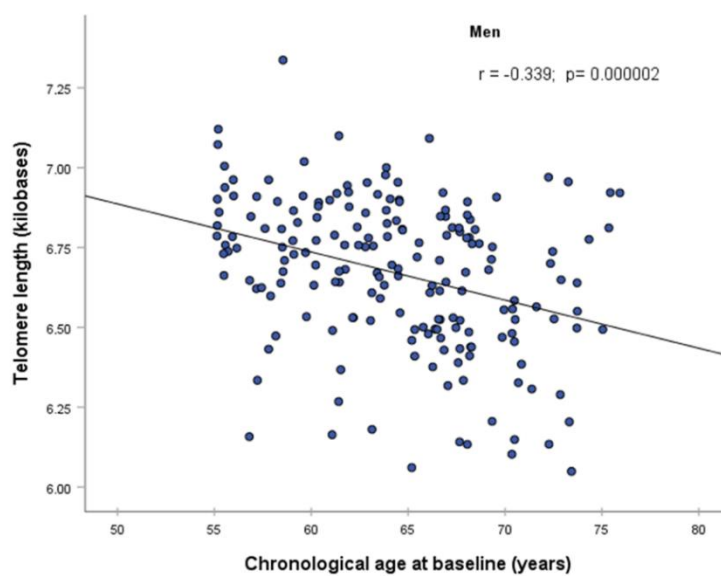

**A**

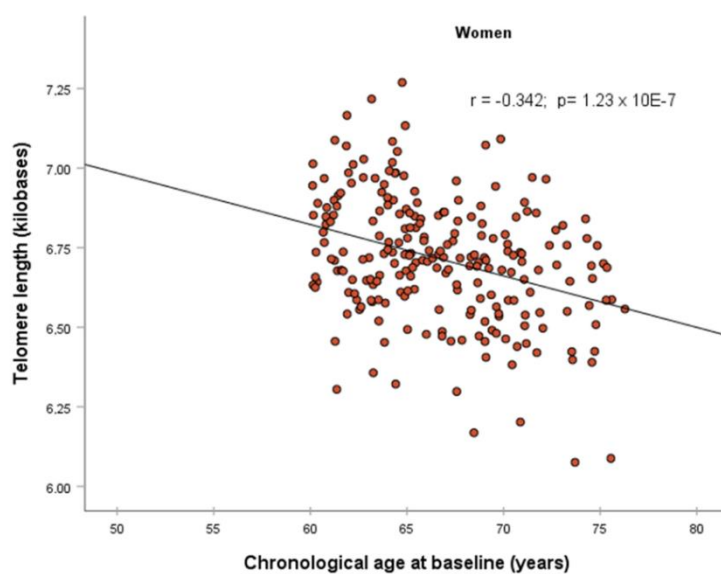

**B**

**Figure S1.** Association between telomere length-DNA methylation and chronological age in men (A), and in women (B). Scatter plots with raw values, Pearson correlation coefficients and p-values.

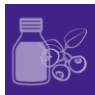**Table S2.** Association between the methylation sites included in the leukocyte DNAmTL computation and the estimated DNAmTL in the population.

| CpG site <sup>1</sup> | Gene Symbol     | Chr | BP        | p <sup>2</sup> | r <sup>3</sup> | Coefficient <sup>4</sup> |
|-----------------------|-----------------|-----|-----------|----------------|----------------|--------------------------|
| cg21566642            | NCAPG           | 4   | 17813558  | 5.80E-20       | 0.4387         | 0.1155                   |
| cg14391737            | CCND3           | 6   | 41904398  | 2.25E-16       | 0.3976         | 0.6714                   |
| cg01940273            | TPI1            | 12  | 6977747   | 1.92E-15       | 0.3859         | 0.2302                   |
| cg17739917            | DHRS3           | 1   | 12664243  | 4.70E-15       | 0.3809         | 0.2783                   |
| cg21911711            | DNTT            | 10  | 98062687  | 1.81E-12       | -0.3452        | -0.0719                  |
| cg00475490            | YPEL3           | 16  | 30106682  | 1.02E-10       | -0.3182        | -0.2502                  |
| cg24859433            | TPST1           | 7   | 65817282  | 4.23E-09       | 0.2905         | 0.0222                   |
| cg18110140            | CCDC102B        | 18  | 66389420  | 4.82E-09       | 0.2895         | 0.1152                   |
| cg09935388            | SRRM3           | 7   | 75897850  | 7.19E-09       | 0.2863         | 0.2527                   |
| cg25648203            | C7orf41         | 7   | 30185776  | 9.24E-09       | -0.2843        | -0.3828                  |
| cg25189904            | NA-CHL1         | 3   | 153242    | 1.02E-08       | 0.2835         | 0.1325                   |
| cg19572487            | MMEL1-ACTRT2    | 1   | 2778841   | 1.44E-08       | 0.2807         | 0.0549                   |
| cg26703534            | FREM1           | 9   | 14910689  | 1.59E-08       | 0.2799         | 0.0909                   |
| cg01901332            | PRMT2           | 21  | 48081242  | 2.99E-08       | 0.2747         | 0.2711                   |
| cg03636183            | CALN1           | 7   | 71800412  | 6.55E-08       | 0.2681         | 0.0950                   |
| cg17287155            | ELOVL2          | 6   | 11044877  | 8.49E-08       | -0.2658        | -0.9413                  |
| cg04551776            | IQCE            | 7   | 2644443   | 1.08E-07       | 0.2638         | 0.6262                   |
| cg15342087            | LIPF            | 10  | 90428384  | 1.26E-07       | -0.2624        | -0.3370                  |
| cg05086879            | FAM69A          | 1   | 93416982  | 1.63E-07       | 0.2601         | 0.1645                   |
| cg05575921            | PDCD1LG2        | 9   | 5510497   | 4.33E-07       | 0.2513         | 0.2854                   |
| cg23161492            | BAT3            | 6   | 31607674  | 4.50E-07       | 0.2510         | 0.0642                   |
| cg11660018            | NPTX2           | 7   | 98245716  | 5.94E-07       | -0.2484        | -0.0383                  |
| cg05284742            | ANKRD11         | 16  | 89387014  | 7.01E-07       | 0.2469         | 0.1133                   |
| cg11556164            | AMZ1-GNA12      | 7   | 2764599   | 8.99E-07       | -0.2445        | -0.0010                  |
| cg14580211            | COL6A1          | 21  | 47404109  | 1.48E-06       | 0.2398         | 0.3663                   |
| cg16841366            | TCF3            | 19  | 1617027   | 2.79E-06       | -0.2335        | -0.2229                  |
| cg19859270            | TRIM8           | 10  | 104406990 | 3.32E-06       | -0.2318        | -0.2483                  |
| cg18146737            | DGKI            | 7   | 137223417 | 4.28E-06       | 0.2292         | 0.0869                   |
| cg04535902            | TARP-AMPH       | 7   | 38351226  | 4.92E-06       | 0.2278         | 0.0619                   |
| cg17738628            | SERINC5         | 5   | 79490511  | 1.06E-05       | -0.2199        | -0.0278                  |
| cg02319782            | IQSEC3-SLC6A12  | 12  | 291668    | 1.90E-05       | 0.2136         | 0.6466                   |
| cg07739478            | C6orf25         | 6   | 31692234  | 2.26E-05       | 0.2117         | 0.0443                   |
| cg06132400            | TARP-AMPH       | 7   | 38350938  | 3.64E-05       | 0.2064         | 0.0482                   |
| cg13357922            | SPRN-LOC619207  | 10  | 135251512 | 4.16E-05       | 0.2049         | 0.1159                   |
| cg00580497            | SLC12A7-SLC6A19 | 5   | 1153746   | 4.47E-05       | 0.2041         | 0.2946                   |

BMI: Body Mass Index; Chr: chromosome; SNP: single nucleotide polymorphism. BP: Base position of the probe in the chromosome (Homo Sapiens GRCh37.p13 genome build). Beta: regression coefficient indicates the effect for the minor allele on DNAmTL; MAF: minor allele frequency.

<sup>1</sup> Top-ranked CpGs included in the DNAmTL algorithm according to Lu et al. [46].

<sup>2</sup> p-value obtained in this population between the corresponding CpG site and the estimated global DNAmTL. The model was adjusted for sex, age, diabetes, body mass index, batch effect and leukocyte cell-types.

<sup>3</sup> r partial correlation coefficient of the corresponding methylation site and the estimated global DNAmTL in this population.

<sup>4</sup> Coefficient from Lu, et al. [46].

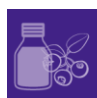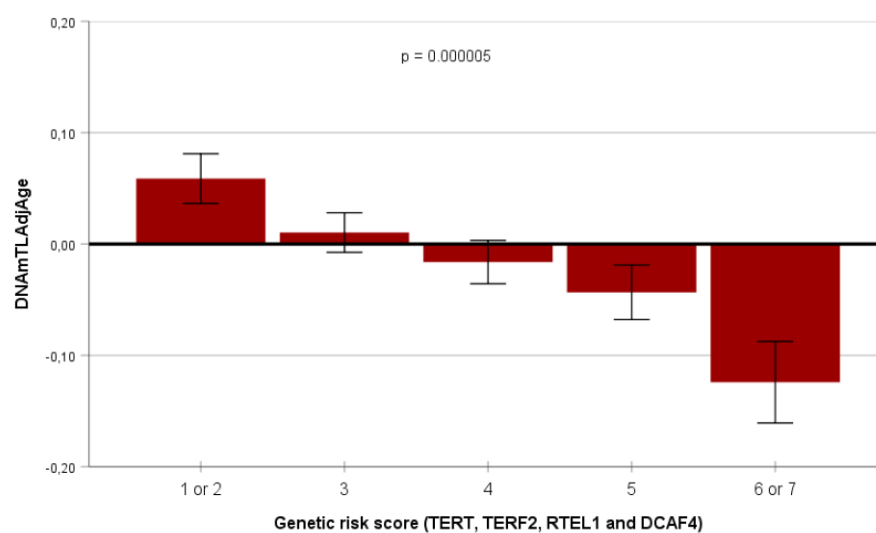

**Figure S2.** Telomere length (DNAmTLAdjAge) depending on the categories of the genetic risk score (GRS) combining the effect alleles (associated with shorter TL) for the SNPs: rs2075786-TERT, rs37850-TERF2, rs6011011-RTEL1, and rs17781739-DCAF4. Scores 1 and 2, and 6 and 7 were combined.  $P=0.0002$  for association in a model adjusted for age, sex, diabetes and body mass index.  $P$ -value obtained in the adjusted model for the trend in the GRS score.

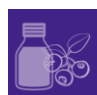**Table S3.** Compliance (%) of adherence to the Mediterranean diet for each item of the 17-I score by sex.

| Food items and frequency of consumption                                                                          | Total<br>(n=414) | Men<br>(n=186) | Women<br>(n=228) | <i>p</i> |
|------------------------------------------------------------------------------------------------------------------|------------------|----------------|------------------|----------|
| 1. Do you use olive oil as main culinary fat?                                                                    | 55.1             | 57.5           | 53.1             | 0.365    |
| 2. How many vegetable servings do you consume per day?                                                           | 51.7             | 44.1           | 57.9             | 0.005    |
| 3. How many pieces of fruit or 100% natural fruit juice do you consume per day?                                  | 50.0             | 48.4           | 51.3             | 0.553    |
| 4. How many servings of red meat, hamburger, or meat products do you consume per week?                           | 47.6             | 44.6           | 50.0             | 0.276    |
| 5. How many servings of butter, margarine, or cream do you consume per week?                                     | 82.4             | 81.2           | 83.3             | 0.568    |
| 6. How many sugar-sweetened beverages do you consume per week?                                                   | 57.7             | 54.8           | 60.1             | 0.282    |
| 7. How many servings of legumes do you consume per week?                                                         | 12.3             | 15.1           | 10.1             | 0.126    |
| 8. How many servings of fish / shellfish do you consume per week?                                                | 43.0             | 40.9           | 44.7             | 0.428    |
| 9. How many times per week do you consume pastries, such as cookies, sweets, or cakes?                           | 44.7             | 47.8           | 42.1             | 0.242    |
| 10. How many times per week do you consume nuts <sup>2</sup> ?                                                   | 41.5             | 45.7           | 38.2             | 0.121    |
| 11. Do you preferentially consume chicken, turkey, or rabbit meat instead of beef, pork, hamburgers, or sausage? | 77.5             | 73.7           | 80.7             | 0.088    |
| 12. How many times per week do you consume vegetables, pasta, rice, or other dishes seasoned with sofrito?       | 63.0             | 63.4           | 62.7             | 0.880    |
| 13. Do you add sugar to beverages (coffee, tea)?                                                                 | 68.4             | 57.0           | 77.6             | <0.001   |
| 14. How many servings of white bread do you consume per day?                                                     | 39.1             | 32.8           | 44.3             | 0.017    |
| 15. How many servings of whole grains do you consume per week?                                                   | 27.1             | 20.4           | 32.5             | 0.006    |
| 16. How many servings of refined bread, rice and/or pasta do you consume per week?                               | 25.6             | 28.5           | 23.2             | 0.224    |
| 17. Do you drink wine? How much do you consume per week?                                                         | 17.4             | 29.0           | 7.9              | <0.001   |

Values are % compliance (see Table S1 for compliance details) for each item of the adherence to the Mediterranean diet (MedDiet) of 17 points. *p*: *p*-values for differences between men and women.

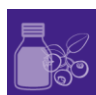

**Table S4.** Association between the particular items (foods/beverages) of the Mediterranean diet score (17-I) with telomere length by sex. P-values for the multivariable adjusted model are shown.

|                                                                                                                  | Total<br>(n=414) | Men<br>(n=186) | Women<br>(n=228) |
|------------------------------------------------------------------------------------------------------------------|------------------|----------------|------------------|
| Food items and frequency of consumption                                                                          | p                | p              | p                |
| 1. Do you use olive oil as main culinary fat?                                                                    | 0.802            | 0.504          | 0.274            |
| 2. How many vegetable servings do you consume per day?                                                           | 0.603            | 0.716          | 0.718            |
| 3. How many pieces of fruit or 100% natural fruit juice do you consume per day?                                  | 0.009            | 0.184          | 0.014            |
| 4. How many servings of red meat, hamburger, or meat products do you consume per week?                           | 0.862            | 0.328          | 0.192            |
| 5. How many servings of butter, margarine, or cream do you consume per week?                                     | 0.515            | 0.112          | 0.426            |
| 6. How many sugar-sweetened beverages do you consume per week?                                                   | 0.803            | 0.087          | 0.134            |
| 7. How many servings of legumes do you consume per week?                                                         | 0.638            | 0.344          | 0.628            |
| 8. How many servings of fish / shellfish do you consume per week?                                                | 0.165            | 0.855          | 0.010            |
| 9. How many times per week do you consume pastries, such as cookies, sweets, or cakes?                           | 0.226            | 0.074          | 0.876            |
| 10. How many times per week do you consume nuts?                                                                 | 0.979            | 0.341          | 0.325            |
| 11. Do you preferentially consume chicken, turkey, or rabbit meat instead of beef, pork, hamburgers, or sausage? | 0.457            | 0.340          | 0.965            |
| 12. How many times per week do you consume vegetables, pasta, rice, or other dishes seasoned with sofrito?       | 0.031            | 0.731          | 0.005            |
| 13. Do you add sugar to beverages (coffee, tea)?                                                                 | 0.386            | 0.444          | 0.677            |
| 14. How many servings of white bread do you consume per day?                                                     | 0.561            | 0.780          | 0.572            |
| 15. How many servings of whole grains do you consume per week?                                                   | 0.003            | 0.042          | 0.011            |
| 16. How many servings of refined bread, rice and/or pasta do you consume per week?                               | 0.345            | 0.408          | 0.014            |
| 17. Do you drink wine? How much do you consume per week?                                                         | 0.791            | 0.844          | 0.860            |

Values are *p*-values for the association between each particular item of the score and DNAmTL by sex (models adjusted for age, sex, diabetes and BMI) for each item of the adherence to the Mediterranean diet (MedDiet) of 17 points. See criteria for compliance in Table S1.

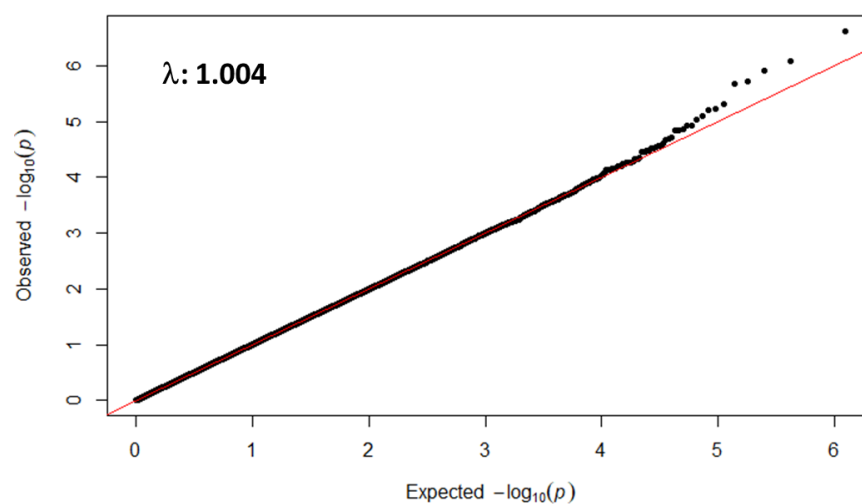

**Figure S3.** Q-Q plot for the Genome-Wide Association Study (GWAS) of telomere length (DNAmTL) adjusted for sex and age in this population.  $\lambda$ : lambda.



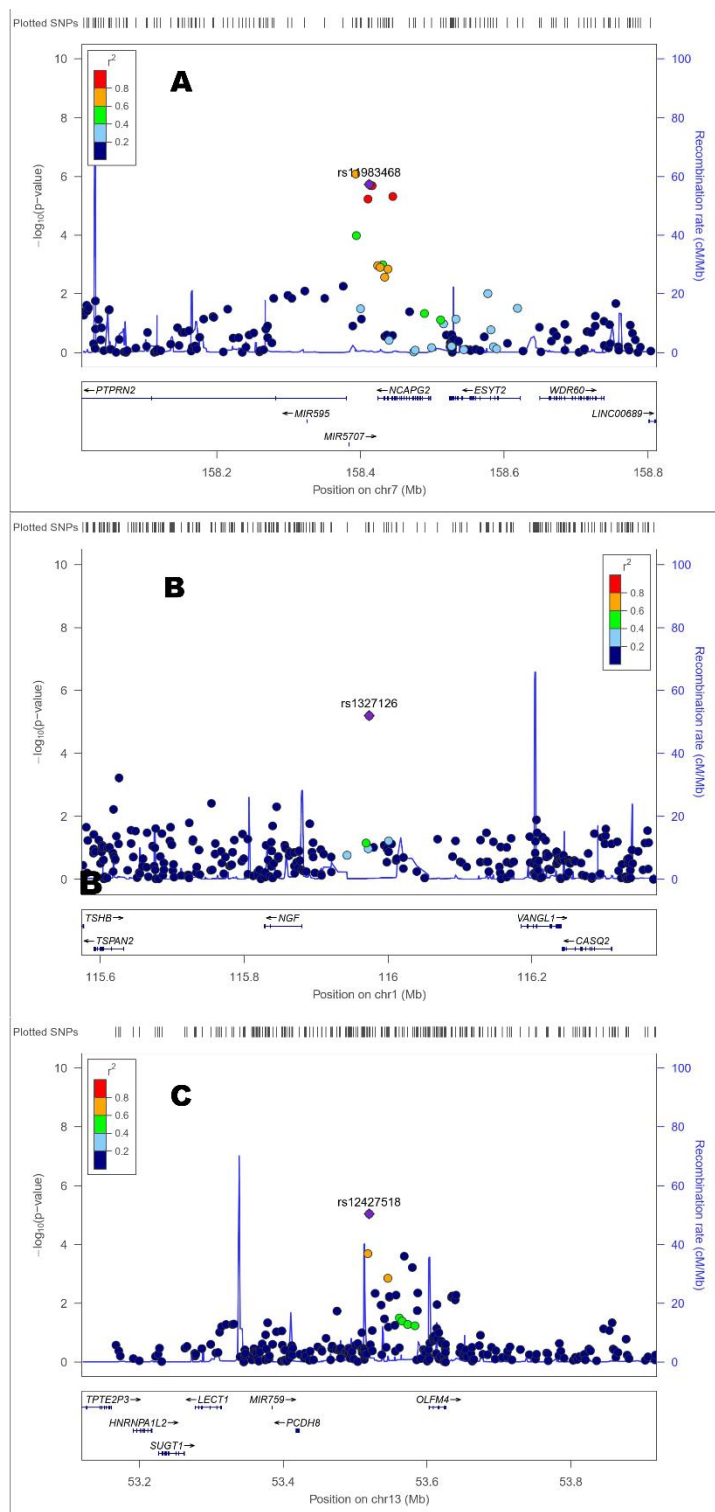

**Figure S4.** Zoom plots of the selected top-ranked SNPs for the GWAS of DNAmTL in this population (Table 5). The panel shows the following SNPs: A) rs1983468 (Chr.: 7;  $p=1.86\text{E-}06$ ); B) rs1327126 (Chr.: 1;  $p=6.27\text{E-}06$ ); C) rs12427518 (Chr.: 13;  $p=9.12\text{E-}06$ ).

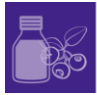**Table S5.** FORGEdb total and detailed scores for the 10 top-ranked SNPs in the GWAS for DNAmTL in the whole population (Table 5).

|                                                                | rs9529615 | rs2178528 | rs662538 | rs11983468 | rs11763040 | rs1466210 | rs7788516 | rs1327126 | rs7613610 | rs12427518 |
|----------------------------------------------------------------|-----------|-----------|----------|------------|------------|-----------|-----------|-----------|-----------|------------|
| Summary and number of annotations for each SNP (FORGEdb score) | 5         | 6         | 8        | 7          | 8          | 8         | 8         | 6         | 7         | 10         |
| RefSeq closest gene data                                       | 1         | 1         | 1        | 1          | 1          | 1         | 1         | 1         | 1         | 1          |
| UCSC genome browser data                                       | 1         | 1         | 1        | 1          | 1          | 1         | 1         | 1         | 1         | 1          |
| CADD v1.6 annotations                                          | 3         | 3         | 3        | 3          | 3          | 3         | 3         | 3         | 3         | 3          |
| GTEx cis-eQTLs                                                 | 0         | 7         | 0        | 11         | 12         | 19        | 9         | 1         | 4         | 0          |
| eQTLGen blood cis-eQTLs                                        | 0         | 3         | 1        | 3          | 3          | 3         | 3         | 0         | 3         | 2          |
| ABC contacts                                                   | 0         | 0         | 0        | 0          | 0          | 0         | 10        | 0         | 0         | 1          |
| FORGE2-TF motifs                                               | 2         | 0         | 12       | 0          | 3          | 1         | 0         | 0         | 0         | 2          |
| CATO score                                                     | 0         | 0         | 1        | 1          | 1          | 1         | 0         | 0         | 1         | 1          |
| FORGE2 consolidated roadmap DNase I hotspots (erc2-DHS)        | 0         | 0         | 5        | 0          | 0          | 4         | 6         | 0         | 1         | 1          |
| FORGE2 consolidated roadmap H3 histone marks (erc2-H3-all)     | 45        | 22        | 64       | 52         | 47         | 59        | 60        | 25        | 20        | 75         |
| FORGE2 unconsolidated roadmap DNase I hotspots (erc)           | 35        | 1         | 34       | 3          | 0          | 67        | 72        | 4         | 26        | 5          |
| FORGE2 blueprint DNase I hotspots (blueprint)                  | 0         | 0         | 1        | 0          | 0          | 0         | 0         | 0         | 0         | 18         |
| FORGE2 ENCODE DNase I hotspots (encode)                        | 4         | 7         | 48       | 6          | 11         | 30        | 38        | 11        | 4         | 3          |
| FORGE2 consolidated roadmap chromatin states (erc2-15state)    | 127       | 127       | 127      | 127        | 127        | 127       | 127       | 127       | 127       | 127        |

A Forgedb score of 10 (the highest score) is computed from the presence of: 10 = eQTL + ABC + TF motif + CATO + DNase I hotspot + histone mark ChIP-seq. A FORGEdb score of 9 (the second highest score) is computed from the presence of: 9 = eQTL + ABC + {TF motif|CATO} + DNase I hotspot + histone mark ChIP-seq (Source: [https://forge2.altiusinstitute.org/files/FORGEdb\\_scores.html](https://forge2.altiusinstitute.org/files/FORGEdb_scores.html)).

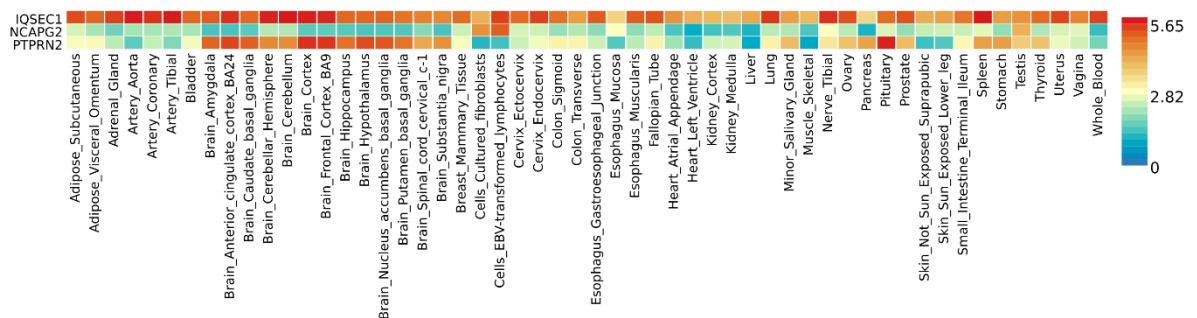**Figure S5.** Gene expression heatmap based on the dataset GTExV8 (54 tissue types), showing the average expression for the IQSEL1, NACPG2 and PTPRN2 genes selected in the GWAS for DNAmTL.



**Table S6.** Coefficients obtained in the SNP-based Genome-Wide Association Study (GWAS) for DNAmTL adjusted for additional covariates.

| Chr | SNP        | BP        | Beta     | $p^1$    | MAF       | Gene Symbol  |
|-----|------------|-----------|----------|----------|-----------|--------------|
| 13  | rs9529615  | 35307066  | 0.07276  | 2.52E-07 | 0.327077  | intergenic   |
| 7   | rs2178528  | 158393488 | -0.07343 | 9.94E-07 | 0.245208  | intergenic   |
| 3   | rs662538   | 13135500  | -0.13040 | 1.81E-06 | 0.0223642 | IQSEC1       |
| 7   | rs11983468 | 158412279 | -0.07387 | 3.31E-06 | 0.198682  | intergenic   |
| 7   | rs11763040 | 158416203 | -0.07461 | 3.56E-06 | 0.203674  | intergenic   |
| 7   | rs1466210  | 158444975 | -0.07691 | 8.24E-06 | 0.198482  | NCAPG2       |
| 7   | rs7788516  | 158410592 | -0.07035 | 8.95E-06 | 0.206669  | intergenic   |
| 1   | rs1327126  | 115973920 | 0.06237  | 9.93E-06 | 0.396765  | intergenic   |
| 15  | rs4906654  | 26274113  | 0.10020  | 9.96E-06 | 0.252396  | LOC100128714 |
| 13  | rs12427518 | 53519692  | 0.13010  | 1.04E-05 | 0.229034  | intergenic   |
| 3   | rs7613610  | 100499321 | 0.08015  | 1.04E-05 | 0.277556  | ABI3BP       |
| 16  | rs11076786 | 3811596   | 0.10330  | 1.33E-05 | 0.140176  | CREBBP       |
| 1   | rs11164337 | 102389733 | -0.0748  | 1.41E-05 | 0.467652  | OLFM3        |
| 13  | rs17504027 | 30587544  | 0.14260  | 1.59E-05 | 0.0301518 | intergenic   |
| 8   | rs256      | 19811967  | 0.08255  | 1.70E-05 | 0.144169  | LPL          |
| 15  | rs4777407  | 71826919  | -0.06668 | 1.93E-05 | 0.351438  | THSD4        |
| 2   | rs11124147 | 107623734 | -0.06382 | 1.97E-05 | 0.32488   | intergenic   |

Chr: Chromosome; SNP: single nucleotide polymorphism. BP: Base position in the chromosome (Homo Sapiens GRCh37.p13 genome build used in Illumina HumanOmniExpress-24 BeadChip). Beta: regression coefficient that indicates the effect for the minor allele on DNAmTL; MAF: minor allele frequency. BMI: Body mass index in Kg/m<sup>2</sup>.

<sup>1</sup>. p-value obtained in the multivariate regression model adjusted for sex, age, diabetes, and BMI for each SNP using a genetic additive approach.

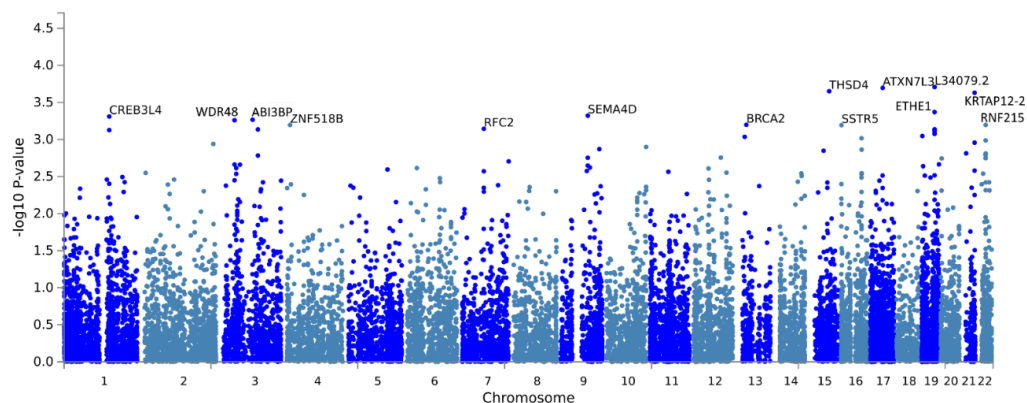

**Figure S6.** Manhattan plot for the gene-based GWAS analysis for telomere length-DNA methylation adjusted for age. The 14 top-ranked genes were annotated.

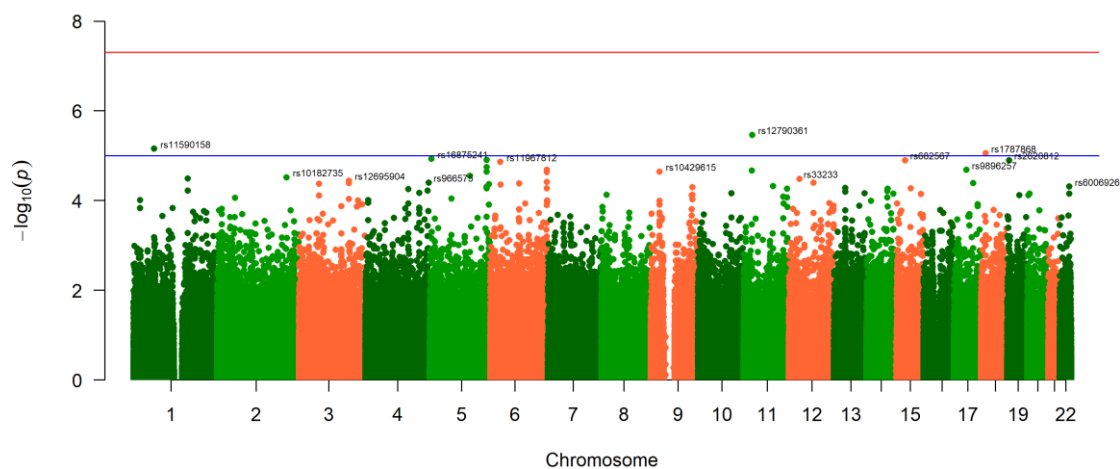

**Figure S7.** Manhattan plot of the SNP-based GWAS analyzing the interaction between the SNPs and adherence to Mediterranean Diet (as dichotomous variable of 2 categories: low and high) in determining telomere length (DNAmTLAdjustAge). The top-ranked SNPs were annotated. The red line represents the threshold 1 ( $-\log_{10}(5 \times 10^{-8})$ ) for the GWAS statistical significance. The blue line represents the threshold 2 ( $-\log_{10}(1 \times 10^{-5})$ ).
